# Supplementary material for: Community participation in coastal and marine research and monitoring in Inuit Nunangat: a scoping literature review
Source: Atypon-hosted journal article supplement (doi:10.1139/facets-2021-0067), 2022-01-01
Supplement: facets-2021-0067_supplement1.pdf [file facets-2021-0067_supplement1.pdf]

# Supplementary File A

Table 1. Questionnaire

|                                  | <b>Variable</b>                                            | <b>Definition/Description</b>                                                                                                                                                                                                                                                                                                                                                                                                                                                                                                                                                                                                                                                                                                                                                                                                                                                                                                              |
|----------------------------------|------------------------------------------------------------|--------------------------------------------------------------------------------------------------------------------------------------------------------------------------------------------------------------------------------------------------------------------------------------------------------------------------------------------------------------------------------------------------------------------------------------------------------------------------------------------------------------------------------------------------------------------------------------------------------------------------------------------------------------------------------------------------------------------------------------------------------------------------------------------------------------------------------------------------------------------------------------------------------------------------------------------|
| <b>Bibliographic Information</b> |                                                            |                                                                                                                                                                                                                                                                                                                                                                                                                                                                                                                                                                                                                                                                                                                                                                                                                                                                                                                                            |
| 1.                               | <b>Type of publication</b>                                 | Classification of publication type. <ul style="list-style-type: none"> <li>• Peer-reviewed article</li> <li>• Conference paper</li> <li>• Master's thesis</li> <li>• PhD dissertation</li> <li>• Book chapter</li> </ul>                                                                                                                                                                                                                                                                                                                                                                                                                                                                                                                                                                                                                                                                                                                   |
| 2.                               | <b>Full reference</b>                                      | -                                                                                                                                                                                                                                                                                                                                                                                                                                                                                                                                                                                                                                                                                                                                                                                                                                                                                                                                          |
| 3.                               | <b>Article/chapter title</b>                               | Full title of the article.                                                                                                                                                                                                                                                                                                                                                                                                                                                                                                                                                                                                                                                                                                                                                                                                                                                                                                                 |
| 4.                               | <b>Publication year</b>                                    | Year in which the article was published.                                                                                                                                                                                                                                                                                                                                                                                                                                                                                                                                                                                                                                                                                                                                                                                                                                                                                                   |
| 5.                               | <b>Journal title, book or conference title</b>             | Title of journal or book in which the article was published, or conference where article was presented.                                                                                                                                                                                                                                                                                                                                                                                                                                                                                                                                                                                                                                                                                                                                                                                                                                    |
| 6.                               | <b>Publication DOI</b>                                     | -                                                                                                                                                                                                                                                                                                                                                                                                                                                                                                                                                                                                                                                                                                                                                                                                                                                                                                                                          |
| 7.                               | <b>Publication key words</b>                               | If provided.                                                                                                                                                                                                                                                                                                                                                                                                                                                                                                                                                                                                                                                                                                                                                                                                                                                                                                                               |
| 8.                               | <b>Abstract</b>                                            | -                                                                                                                                                                                                                                                                                                                                                                                                                                                                                                                                                                                                                                                                                                                                                                                                                                                                                                                                          |
| <b>Location and Objectives</b>   |                                                            |                                                                                                                                                                                                                                                                                                                                                                                                                                                                                                                                                                                                                                                                                                                                                                                                                                                                                                                                            |
| 9.                               | <b>Region of Inuit Nunangat</b>                            | Region of Inuit Nunangat where study was conducted. <ul style="list-style-type: none"> <li>• Nunavut</li> <li>• Nunavik (Québec)</li> <li>• Nunatsiavut (Labrador)</li> <li>• Inuvialuit Settlement Region (Northwest Territories and Yukon Territory)</li> </ul>                                                                                                                                                                                                                                                                                                                                                                                                                                                                                                                                                                                                                                                                          |
| 10.                              | <b>Name of community/communities involved</b>              | Current name of community or communities where study was conducted as described in the article. A Google search engine was used when necessary.                                                                                                                                                                                                                                                                                                                                                                                                                                                                                                                                                                                                                                                                                                                                                                                            |
| 11.                              | <b>Alternative or former name of community/communities</b> | Alternative or former (English rather than Inuktitut) name of the community or communities where study was conducted. A Google search engine was used when necessary.                                                                                                                                                                                                                                                                                                                                                                                                                                                                                                                                                                                                                                                                                                                                                                      |
| 12.                              | <b>Study site(s)</b>                                       | The study site described in as much detail as possible. Pages are noted if figures (ie. maps) are included.                                                                                                                                                                                                                                                                                                                                                                                                                                                                                                                                                                                                                                                                                                                                                                                                                                |
| 13.                              | <b>What was the research question(s) or objective(s)?</b>  | Research questions or objectives as noted in the abstract or introduction section of the article, copied verbatim.<br><br>Follow-up question with selection of any number of the following: <ul style="list-style-type: none"> <li>• Community involvement/participation</li> <li>• Track and/or adapt to environmental/climate change</li> <li>• Biodiversity conservation</li> <li>• Resource/wildlife management</li> <li>• Wildlife health</li> <li>• Ecosystem health</li> <li>• Protected areas management/protection of species habitat</li> <li>• Inform ecological restoration</li> <li>• Ensure continued access to culturally important species</li> <li>• Related to human health and/or wellbeing</li> <li>• Education</li> <li>• Track land use change</li> <li>• Economic development/improvement of livelihood</li> <li>• Monitoring impacts of industrial development</li> <li>• Document Indigenous knowledge</li> </ul> |

- Bridge Indigenous knowledge and Western science
- Enhance use of Indigenous knowledge in management
- Enacting Indigenous governance
- Unclear
- Other (please specify)

**14. Is this study part of a larger project?**

Note whether this study occurred as part of a larger research endeavour. If so, provide the name of the project and any relevant details.

---

**Research Details**

---

**15. Who in the community is involved?**

The community groups involved in the study, noted in the study.

- Hunters/fishers
- HTA/HTO/HTC
- Community committee
- Co-management committee
- Entire community
- Other community members
- Youth
- Elders
- Not specified
- Other (please specify)

**16. What methods were used to gather Indigenous knowledge? (data collection)**

The Indigenous knowledge methods used for data collection.

- Interviews (structured, unstructured)
- Oral history
- Survey
- Focus groups
- Sharing circle
- Workshop (includes community meetings)
- Ceremony
- Participatory mapping
- Field observation
- Participant observation (in community)
- Document review
- Photovoice
- Media (includes participatory video, digital storytelling, radio broadcasts)
- Indigenous knowledge was not gathered
- Other (please specify)

**17. What Western scientific methods did Indigenous community members contribute to in this study? (data collection)**

Western scientific methods used for data collection with community involvement.

- Telemetry, tracking devices
- Mark-recapture studies
- Natural history observations
- Counts, census data, stock assessment
- Tissue sampling
- Examination of whole carcasses, dissections
- Experimental manipulation
- Water sampling
- Sea ice observations/measurements
- Mapping
- Simulation
- Document/literature review
- Community members did not contribute to data collection
- Not applicable
- Other (please specify)

|                                                                                                          |                                                                                                                                                                                                                                                                                                                                                                                                                                                                                                                                                                                                                                                                                      |
|----------------------------------------------------------------------------------------------------------|--------------------------------------------------------------------------------------------------------------------------------------------------------------------------------------------------------------------------------------------------------------------------------------------------------------------------------------------------------------------------------------------------------------------------------------------------------------------------------------------------------------------------------------------------------------------------------------------------------------------------------------------------------------------------------------|
| <b>18. What Western scientific methods were used in this study <u>without</u> community involvement?</b> | Western scientific methods used for data collection that did not include community involvement. <ul style="list-style-type: none"> <li>• Telemetry, tracking devices</li> <li>• Mark-recapture studies</li> <li>• Natural history observations (behaviour, reproduction, predation events)</li> <li>• Counts, census data, stock assessment</li> <li>• Tissue sampling</li> <li>• Examination of whole carcasses, dissections</li> <li>• Experimental manipulation</li> <li>• Water sampling</li> <li>• Sea ice observations/measurements</li> <li>• Mapping</li> <li>• Simulation</li> <li>• Document/literature review</li> <li>• Not applicable</li> </ul> Other (please specify) |
| <b>19. Common name - what species were studied?</b>                                                      | The common name for the species studied.                                                                                                                                                                                                                                                                                                                                                                                                                                                                                                                                                                                                                                             |
| <b>20. Latin name - what species were studied?</b>                                                       | The Latin name for the species studied.                                                                                                                                                                                                                                                                                                                                                                                                                                                                                                                                                                                                                                              |
| <b>21. What was the subject of the research? (more details)</b>                                          | The research subject in more detail.                                                                                                                                                                                                                                                                                                                                                                                                                                                                                                                                                                                                                                                 |

---

### Characterization of Participation

|                                                                      |                                                                                                                                                                                                                                                                                                                                                                                                                                                                                                                                                                                                                                                                                                                                                                                                                                                                                                                                            |
|----------------------------------------------------------------------|--------------------------------------------------------------------------------------------------------------------------------------------------------------------------------------------------------------------------------------------------------------------------------------------------------------------------------------------------------------------------------------------------------------------------------------------------------------------------------------------------------------------------------------------------------------------------------------------------------------------------------------------------------------------------------------------------------------------------------------------------------------------------------------------------------------------------------------------------------------------------------------------------------------------------------------------|
| <b>22. Notes related to amount/frequency/nature of participation</b> | Notes on the amount, frequency or nature of participation with the community (copied verbatim).                                                                                                                                                                                                                                                                                                                                                                                                                                                                                                                                                                                                                                                                                                                                                                                                                                            |
| <b>23. Level of participation</b>                                    | Classification of level of participation at the study as a whole. Levels adapted from David-Chavez and Gavin (2018). <ul style="list-style-type: none"> <li>• Less than contractual (i.e. only research subjects, passive)</li> <li>• Contractual (community members only contracted to perform tasks, researchers make all decisions)</li> <li>• Consultative (community members asked for opinions and consulted, decisions made by researchers; may include community members being contracted)</li> <li>• Collaborative (community members and researchers work together, researchers have primary authority over process)</li> <li>• Collegial (community members and researchers work together, community members have primary authority over the process)</li> <li>• Indigenous-led (process is centered in Indigenous value systems and historical context, community members have authority over the research process)</li> </ul> |

---

### Terminology Use

|                                                          |                                                                                                                                                                                                                                                                                                                                                                                                                                                                          |
|----------------------------------------------------------|--------------------------------------------------------------------------------------------------------------------------------------------------------------------------------------------------------------------------------------------------------------------------------------------------------------------------------------------------------------------------------------------------------------------------------------------------------------------------|
| <b>24. What community participation terms were used?</b> | All community participation terms used in the body of the publication (excluding the title, abstract, acknowledgements and references sections). <ul style="list-style-type: none"> <li>• Community-based</li> <li>• Community-led</li> <li>• Community-driven</li> <li>• Co-product*</li> <li>• Co-integrat*</li> <li>• Collaborat*</li> <li>• Consult*</li> <li>• Participat*</li> <li>• No community research terms used</li> <li>• Other (please specify)</li> </ul> |
|----------------------------------------------------------|--------------------------------------------------------------------------------------------------------------------------------------------------------------------------------------------------------------------------------------------------------------------------------------------------------------------------------------------------------------------------------------------------------------------------------------------------------------------------|

25. **Which community participation term was used most frequently?** The community participation term used most frequently.
- Community-based
  - Community-led
  - Community-driven
  - Co-product\*
  - Co-integrat\*
  - Collaborat\*
  - Consult\*
  - Participat\*
  - No community research terms used
  - Other (please specify)
26. **Did the author(s) define any community participation terms?** Did the author define any of the community participation terms appearing in the study?
- Yes
  - No
  - Not applicable; no terms were used
27. **Community participation definitions** The definitions provided for community participation terms (copied verbatim).
